# Supplementary material for: Phase I study of the recombinant humanized anti-HER2 monoclonal antibody–MMAE conjugate RC48-ADC in patients with HER2-positive advanced solid tumors
Source: Springer Nature journal article supplement (doi:10.1007/s10120-021-01168-7), 2021-05-04

## 北京肿瘤医院医学伦理委员会

## 伦理审查批件

|         |                                                                                                      |      |       |
|---------|------------------------------------------------------------------------------------------------------|------|-------|
| 批件号     | 2015YW42                                                                                             |      |       |
| 项目名称    | 注射用重组人源化抗HER2单抗-MMAE 偶联剂(简称:RC48-ADC)治疗HER2阳性晚期恶性实体肿瘤的安全性,耐受性和药代动力学的开放、剂量递增的I期临床研究(方案编号:COO2 CANCER) |      |       |
| 项目负责人   | 沈琳                                                                                                   |      |       |
| 项目负责人科室 | 北京肿瘤医院消化肿瘤内科                                                                                         |      |       |
| 申办方     | 烟台荣昌生物工程有限公司                                                                                         |      |       |
| 审查类别    | 药物                                                                                                   | 审查方式 | 会议审查  |
| 审查日期    | 2015.10.26                                                                                           | 审查结果 | 修改后通过 |
| 复审审查日期  | 2015.11.12                                                                                           | 审查方式 | 快速审查  |
| 审查文件    | 详见目录清单                                                                                               |      |       |

## 审查意见

依据《中华人民共和国执业医师法》、《医疗机构管理条例》、《药物临床试验质量管理规范》、《涉及人体的生物医学研究伦理审查办法(试行)》、《药物临床试验伦理审查工作指导原则》、世界医学会《赫尔辛基宣言》、世界卫生组织《生物医学研究审查伦理委员会操作指南》、国际医学科学组织委员会《涉及人的生物医学研究国际伦理准则》等法律、法规和国际准则,伦理委员会于2015年11月12日对修改后的知情同意书及相关内容进行了审阅,认为基本符合伦理要求,可以开始临床研究。

请遵循伦理委员会批准的方案开展研究,保护受试者的健康与权益。

1. 研究过程中若变更项目负责人,对研究方案、知情同意书、病例报告表、招募材料等的任何修改,请提交修正案审查申请;
2. 发生严重不良事件,请在获知后的24小时内提交严重不良事件报告;
3. 研究者没有遵从方案开展研究,可能对受试者的权益/健康、以及研究的科学性造成不良影响,请提交违规事件报告;
4. 申请人暂停或提前终止临床研究,请及时提交暂停/中止研究报告;
5. 研究结束时,请提交结题报告。
6. 本批件自批准之日起半年内有效,请至少在批件失效日期前1个月内提交研究进展报告。

附:目录清单:

1. 伦理审查申请表
2. CFDA 临床试验批件(批件号:2015L02291;日期:2015年9月22日)
3. 药检报告
4. 临床试验方案(版本号:2.0;版本日期:2015年9月21日)
5. 知情同意书(版本号:2.0;版本日期:2015年11月4日)
6. 病例报告表(版本号:1.0;版本日期:2015年9月27日)

地址:北京市海淀区阜成路52号  
邮编:100142  
电话:0086-10-88196391

No. 52 Fu-cheng Road, Haidian District, Beijing  
Beijing 100142, P.R. China  
Tel: 0086-10-88196391

7. 研究者手册(版本号: 1.0; 版本日期: 2014年8月25日)
8. 本中心主要研究者简历、GCP证书复印件
9. 申办者资质证明
10. GMP声明

|      |                                                                                   |       |            |
|------|-----------------------------------------------------------------------------------|-------|------------|
| 批准日期 | 2015.11.12                                                                        | 批件失效期 | 2016.05.12 |
| 主任签字 | 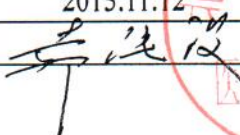 | 签字日期  | 2015.11.12 |

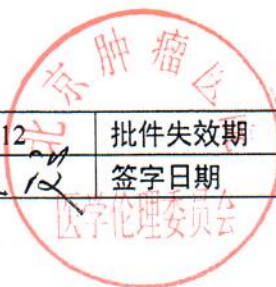

Supplement: MOESM4 [file 19131176]
