# Supplementary material for: Phase I study of the recombinant humanized anti-HER2 monoclonal antibody–MMAE conjugate RC48-ADC in patients with HER2-positive advanced solid tumors
Source: PubMed Central journal article supplement (PMC8205919; doi:10.1007/s10120-021-01168-7), 2021-05-04

**Figure S1.** Mean logarithmic concentration vs. time plot of total antibody (TA, A), binding antibody (BA, B), free MMAE (FM, C) and conjugated MMAE (CM, D) following infusion of RC48 at different dose level.

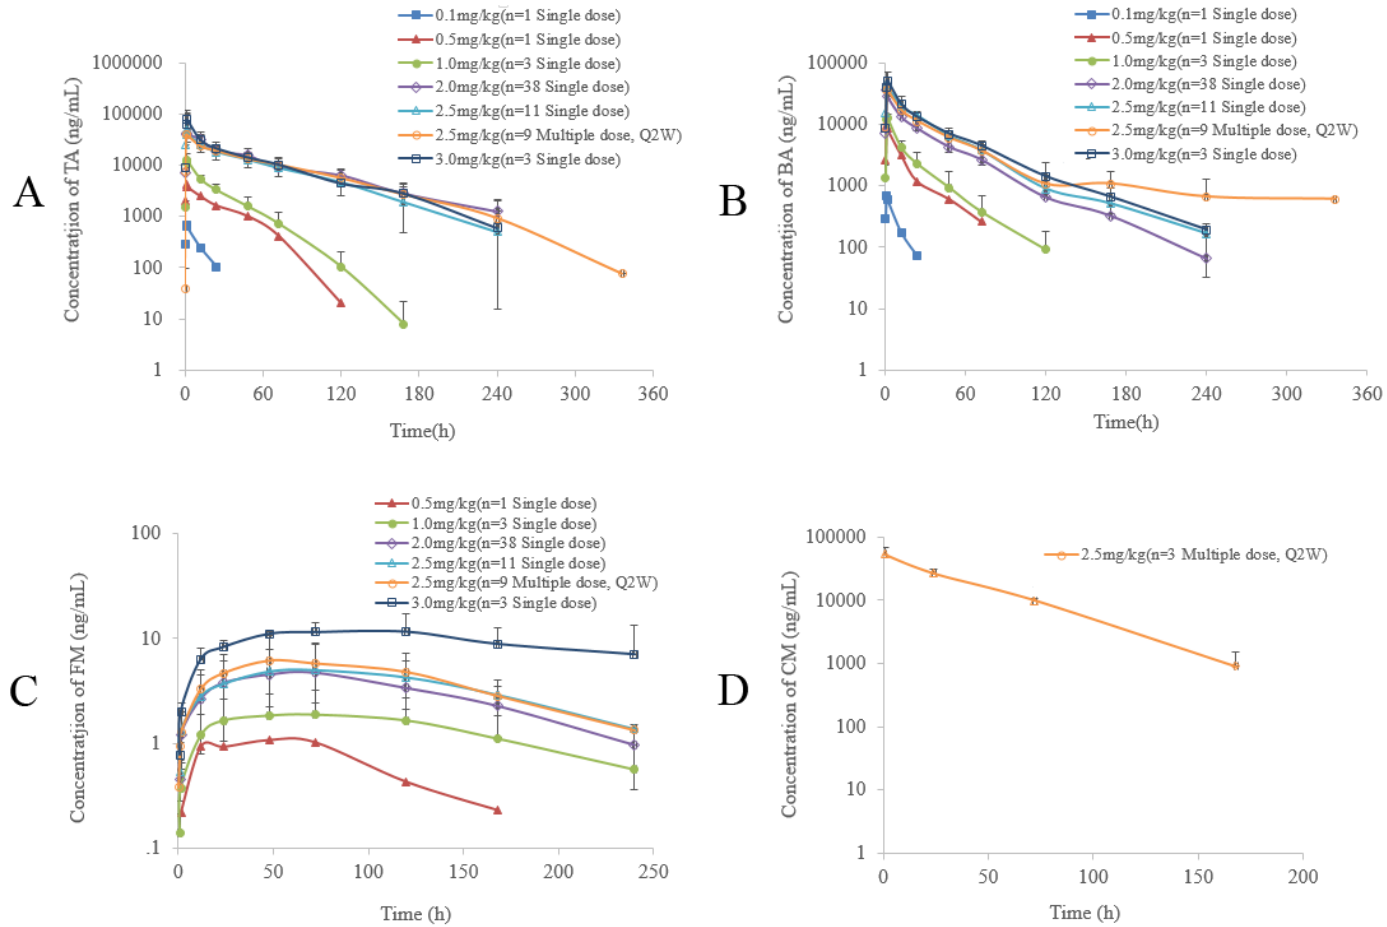

Supplement: 10120_2021_1168_MOESM1_ESM.pdf [file 10120_2021_1168_MOESM1_ESM.pdf]
