# Supplementary material for: Phase I study of the recombinant humanized anti-HER2 monoclonal antibody–MMAE conjugate RC48-ADC in patients with HER2-positive advanced solid tumors
Source: PubMed Central journal article supplement (PMC8205919; doi:10.1007/s10120-021-01168-7), 2021-05-04

**Figure S2.** Duration of treatment by patient

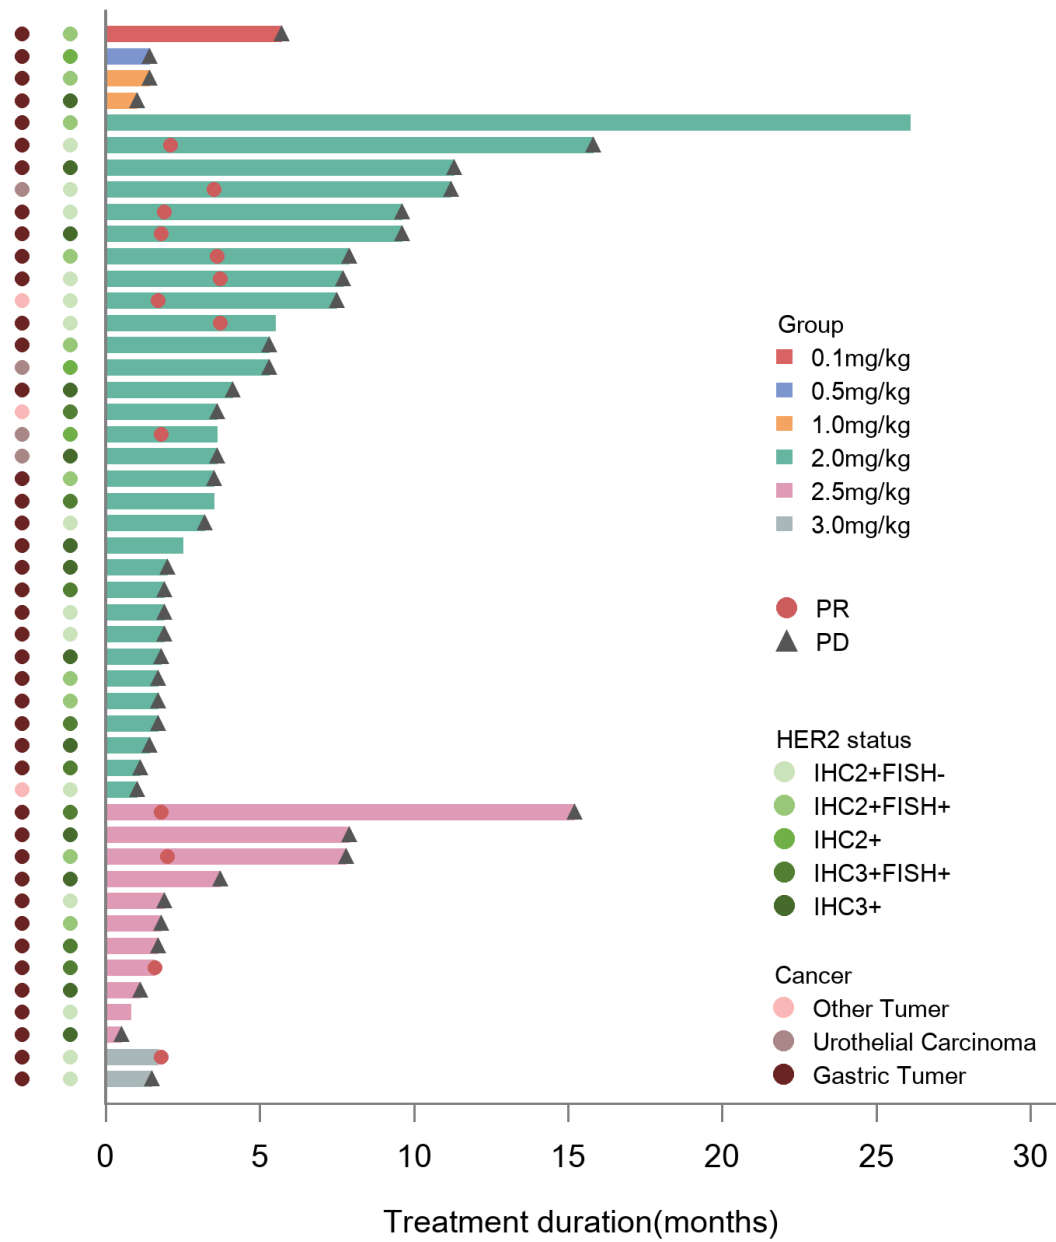

Supplement: 10120_2021_1168_MOESM2_ESM.pdf [file 10120_2021_1168_MOESM2_ESM.pdf]
