# Supplementary material for: Phase I study of the recombinant humanized anti-HER2 monoclonal antibody–MMAE conjugate RC48-ADC in patients with HER2-positive advanced solid tumors
Source: PubMed Central journal article supplement (PMC8205919; doi:10.1007/s10120-021-01168-7), 2021-05-04
Supplement: 10120_2021_1168_MOESM3_ESM.pdf [file 10120_2021_1168_MOESM3_ESM.pdf]

## 北京肿瘤医院医学伦理委员会

### 伦理审查意见

|           |                                                                                                                |      |          |
|-----------|----------------------------------------------------------------------------------------------------------------|------|----------|
| 意见号       | 2015YW42                                                                                                       |      |          |
| 项目名称      | 注射用重组人源化抗 HER2 单抗-MMAE 偶联剂(简称: RC48-ADC) 治疗 HER2 阳性晚期恶性实体肿瘤的安全性, 耐受性和药代动力学的开放、剂量递增的 I 期临床研究(方案编号: C002 CANCER) |      |          |
| 项目负责人     | 沈琳                                                                                                             |      |          |
| 项目负责人所在科室 | 北京肿瘤医院消化肿瘤内科                                                                                                   |      |          |
| 申办方       | 烟台荣昌生物工程有限公司                                                                                                   |      |          |
| 审查类别      | 药物                                                                                                             | 审查方式 | 会议审查     |
| 审查日期      | 2015. 10. 26                                                                                                   | 审查地点 | 科研楼四楼会议室 |
| 评审委员      | 郝纯毅 赵军 吴晓江 谢彦 王天峰 张艳华 白月玲 纪磊 姜炳强<br>文贤子 贾淑芹 韩淑燕 张雷 高静                                                          |      |          |
| 审查文件      | 详见目录清单                                                                                                         |      |          |

#### 审查意见

依据《中华人民共和国执业医师法》、《医疗机构管理条例》、《药物临床试验质量管理规范》、《涉及人体的生物医学研究伦理审查办法(试行)》、《药物临床试验伦理审查工作指导原则》、世界医学会《赫尔辛基宣言》、世界卫生组织《生物医学研究审查伦理委员会操作指南》、国际医学科学组织委员会《涉及人的生物医学研究国际伦理准则》等法律、法规和国家标准, 伦理委员会于 2015 年 10 月 26 日对上述研究方案、知情同意书及有关内容进行了认真讨论并投票表决, 结果如下: 参会人数 14 人, 投票人数 14 人, 通过 0 票, 修改后通过 14 票, 修改后再议 0 票, 未通过 0 票。审查结果决定为**修改后通过**。伦理委员会认为知情同意书应当做进一步修改。

#### 知情同意书修改意见:

1. 在药物不良反应中使用 HER2 单抗可能带来的副作用未告知, 建议补充;
2. 方案中列举的研究可能发生的“骨髓与免疫抑制、肝脏毒性、消化道损伤、生殖毒性、皮肤毒性”在知情研究风险中未告知, 建议补充;
3. 在获益部分, I 期临床研究首先应强调不获益, 建议补充;
4. 受试者职责中建议告知受试者: 哪些为禁用、可酌情使用、需谨慎使用的药物, 并归纳需要详细告知医生您正在使用的药物, 且强调在研究期间用药应当征得研究者同意;
5. 费用和补偿需分别列项, 不要把补偿写在费用项, 建议修改;

地址: 北京市海淀区阜成路 52 号  
邮编: 100142  
电话: 0086-10-88196391

No. 52 Fu-cheng Road, Haidian District, Beijing  
Beijing 100142, P.R. China  
Tel: 0086-10-88196391

6. “如果得到可能影响受试者继续参加试验的信息,受试者或其合法代理人将及时得到通报,或需要签署新的知情同意书”未告知,建议补充;
7. 如受试者是 18 周岁以上具有完全民事行为能力的自然人,签字页中建议删除法定代理人。法定代理人有专门的法律规定。如果需要家属签字,可以写“委托代理人”,同时需要委托书,授权范围有较为严格要求,建议由受试者本人签字,不会写字的受试者由家属代签的,注明代签人,患者摁手印;
8. 建议购买保险。

请提交《复审申请》,回复上述修改意见,按审查意见修改后的文件、方案/知情同意书/招募广告请注明新的版本号和版本日期,并以阴影和/或下划线方式标注修改部分,报伦理委员会审查。逾期 3 个月未提交复审者,将作为自动撤销本项目的审查申请。

附:目录清单:

1. 伦理审查申请表
2. CFDA 临床试验批件(批件号: 2015L02291; 日期: 2015 年 9 月 22 日)
3. 药检报告
4. 临床试验方案(版本号: 2.0; 版本日期: 2015 年 9 月 21 日)
5. 知情同意书(版本号: 1.0; 版本日期: 2015 年 9 月 21 日)
6. 病例报告表(版本号: 1.0; 版本日期: 2015 年 9 月 27 日)
7. 研究者手册(版本号: 1.0; 版本日期: 2014 年 8 月 25 日)
8. 本中心主要研究者简历、GCP 证书复印件
9. 申办者资质证明
10. GMP 声明

北京肿瘤医院医学伦理委员会

主任委员(签名):

日期: 2015.10.26

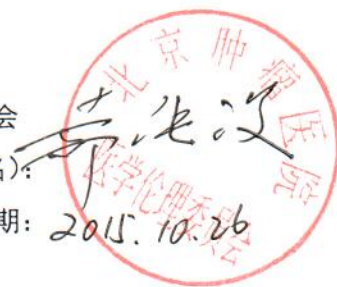

# 北京肿瘤医院医学伦理委员会 签到表及保密协议

## Ethics Committee of Beijing Cancer Hospital Attendance List & Confidential Agreement

作为北京肿瘤医院医学伦理委员会成员，我将对我所审阅的有关资料以及伦理委员会会议的内容保密。

As an Ethics Committee member of Beijing Cancer Hospital, I agree to hold the information of the protocol above and its relevant materials as a confidential manner.

| 职务                    | 姓名  | 签名                                                                                   | 日期         |
|-----------------------|-----|--------------------------------------------------------------------------------------|------------|
| 伦理委员会副主任<br>Signature | 郝纯毅 | 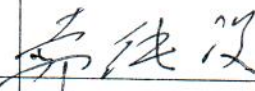  | 2015.10.26 |
| 伦理委员会副主任<br>Signature | 吴晓江 |   | 2015.10.26 |
| 伦理委员会副主任<br>Signature | 王天峰 |  | 2015.10.26 |
| 伦理委员会副主任<br>Signature | 赵军  |  | 2015.10.26 |
| 伦理委员会成员<br>Signature  | 谢彦  |   | 2015.10.26 |
| 伦理委员会成员<br>Signature  | 张艳华 |  | 2015.10.26 |
| 伦理委员会成员<br>Signature  | 白月玲 |   | 2015.10.26 |
| 伦理委员会成员<br>Signature  | 文贤子 |  | 2015.10.26 |
| 伦理委员会成员<br>Signature  | 贾淑芹 |  | 2015.10.26 |
| 伦理委员会成员<br>Signature  | 韩淑燕 |  | 2015.10.26 |

|                      |     |                                                                                    |            |
|----------------------|-----|------------------------------------------------------------------------------------|------------|
| 伦理委员会成员<br>Signature | 高静  | 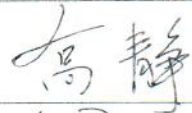 | 2015.10.26 |
| 伦理委员会成员<br>Signature | 张雷  |   | 2015.10.26 |
| 伦理委员会成员<br>Signature | 纪磊  |  | 2015.10.26 |
| 伦理委员会成员<br>Signature | 姜炳强 |  | 2015.10.26 |

**北京肿瘤医院医学伦理委员会**  
**名单及组成情况**  
**Ethics Committee of Beijing Cancer Hospital**  
**Member List**

| Name<br>姓名          | Gender<br>性别 | Unit/Title<br>工作单位和技术职称                                                                                                       | Title in the<br>EC<br>委员会职务 |
|---------------------|--------------|-------------------------------------------------------------------------------------------------------------------------------|-----------------------------|
| Hao Chunyi<br>郝纯毅   | Male<br>男    | Dept. of Hepatic Biliary&Pancreatic surgery,<br>Beijing Cancer Hospital/ Professor<br>本院肝胆胰外科主任医师                             | Vice<br>Chairman<br>副主任     |
| Zhao Jun<br>赵军      | Male<br>男    | Dept. of Thoracic Oncology, Beijing Cancer<br>Hospital/ Associate Professor<br>本院胸部肿瘤内科副主任医师                                  | Member<br>委员                |
| WangTianfeng<br>王天峰 | Male<br>男    | Dept. of Breast Cancer Center, Beijing Cancer<br>Hospital/Associate Professor<br>本院乳腺中心副主任医师                                  | Member<br>委员                |
| Wu Xiaojiang<br>吴晓江 | Male<br>男    | Dept of Gastrointestinal Surgery,<br>Beijing Cancer Hospital/Associate Professor<br>本院胃肠外科副主任医师                               | Member<br>委员                |
| Xie Yan<br>谢彦       | Female<br>女  | Dept. of Lymphoma, Beijing Cancer<br>Hospital/ Associate Professor<br>本院淋巴瘤内科副主任医师                                            | Member<br>委员                |
| Bai Yueling<br>白月玲  | Female<br>女  | Dept. of Nursing, Beijing Cancer<br>Hospital/Associate Professor Of Nursing<br>本院护理部副主任护师                                     | Member<br>委员                |
| Zhang Yanhua<br>张艳华 | Female<br>女  | Dept of Pharmacy,<br>Beijing Cancer Hospital/Chief Pharmacist<br>本院药剂科主任药师                                                    | Member<br>委员                |
| Han Shuyan<br>韩淑燕   | Female<br>女  | Dept. of Integration of Chinese and Western<br>Medicine, Beijing Cancer<br>Hospital/ Associate Professor<br>本院中西医结合暨老年肿瘤科副研究员 | Member<br>委员                |
| ZhangLei<br>张雷      | Male<br>男    | Dept. of Epidemiological Research, Beijing<br>Cancer Hospital/Associate Professor<br>本院流行病学研究室助理研究员                           | Member<br>委员                |
| WenXianZi<br>文贤子    | Female<br>女  | Dept. of Gastric cancer laboratory, Beijing Cancer<br>Hospital/Associate Professor<br>本院胃癌实验室副研究员                             | Member<br>委员                |
| Gao Jing<br>高静      | Female<br>女  | Dept. of GI Oncology, Beijing Cancer<br>Hospital/ Associate Professor<br>本院消化肿瘤内科副教授                                          | Member<br>委员                |
| JiaShuQin<br>贾淑芹    | Female<br>女  | Laboratory of Molecular oncology, Beijing<br>Cancer Hospital/Associate Professor<br>本院分子肿瘤学研究室副研究员                            | Member<br>委员                |

地址: 北京市海淀区阜成路 52 号  
邮编: 100142  
电话: 0086-10-88196391

No. 52 Fu-cheng Road, Haidian District, Beijing  
Beijing 100142, P.R. China  
Tel: 0086-10-88196391

|                       |             |                                                      |              |
|-----------------------|-------------|------------------------------------------------------|--------------|
| Ji Lei<br>纪磊          | Female<br>女 | Beijing Hua Wei Law Office/<br>Lawyer<br>北京华卫律师事务所律师 | Member<br>委员 |
| JiangBingqiang<br>姜炳强 | Male<br>男   | Air Force Command College/Teacher<br>空军指挥学院教员        | Member<br>委员 |

声明:北京肿瘤医院伦理委员会的组成符合 ICH 国际规范和中国 GCP 规范,并遵守上述规范行使其职责和权利。

*Statement:*

*The Ethics Committee of Beijing Cancer Hospital is constituted and functions in accordance with the "ICH-GCP" and "China GCP Guidelines" explained in the "Drug Administration Regulations of People's Republic of China".*
