# Supplementary material for: Phase I study of the recombinant humanized anti-HER2 monoclonal antibody–MMAE conjugate RC48-ADC in patients with HER2-positive advanced solid tumors
Source: PubMed Central journal article supplement (PMC8205919; doi:10.1007/s10120-021-01168-7), 2021-05-04

**Certification for medical or scientific Journal editor  
from Ethics Committee of Beijing Cancer Hospital**

To editor of Gastric Cancer

This clinical research report titled **“Phase I study of the recombinant humanized anti-HER2 monoclonal antibody-MMAE conjugate RC48-ADC in patients with HER2-positive advanced solid tumors”** (Ethics number: 2015YW42) was submitted by Professor Lin Shen. The investigation project and its Informed Consent Form have been examined and certified by Ethics Committee of Beijing Cancer Hospital on 12 (day) 11 (month) 2015 (year).

Ethics Committee of Beijing Cancer Hospital

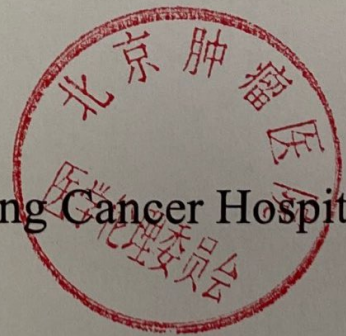

7 (day) 12 (month) 2020 (year)

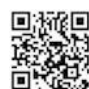

Supplement: 10120_2021_1168_MOESM5_ESM.pdf [file 10120_2021_1168_MOESM5_ESM.pdf]
