# Supplementary material for: Phase I study of the recombinant humanized anti-HER2 monoclonal antibody–MMAE conjugate RC48-ADC in patients with HER2-positive advanced solid tumors
Source: PubMed Central journal article supplement (PMC8205919; doi:10.1007/s10120-021-01168-7), 2021-05-04
Supplement: 10120_2021_1168_MOESM7_ESM.pdf [file 10120_2021_1168_MOESM7_ESM.pdf]

**Supplementary table 2.** Efficacy in gastric cancer subgroup according to previous HER2-targeted therapy.

|                                              | 0.1mg/kg<br>N=1(%) | 0.5mg/kg<br>N=1(%) | 1.0mg/kg Q2W<br>N=2 (%) | 2.0mg/kg Q2W<br>N=26 (%) | 2.0mg/kg Q3W<br>N=3(%) | 2.5mg/kg Q2W<br>N=11(%) | 3.0mg/kg Q2W<br>N=3(%) | In total<br>N=47(%) |
|----------------------------------------------|--------------------|--------------------|-------------------------|--------------------------|------------------------|-------------------------|------------------------|---------------------|
| Not received HER2-targeting therapies before | 1                  | 0                  | 1                       | 16                       | 2                      | 4                       | 3                      | 27                  |
| CR                                           | 0                  | 0                  | 0                       | 0                        | 0                      | 0                       | 0                      | 0                   |
| PR                                           | 0                  | 0                  | 0                       | 4(25.0)                  | 1(50.0)                | 1(25.0)                 | 0                      | 6(22.2)             |
| Unconfirmed PR                               | 0                  | 0                  | 0                       | 0                        | 0                      | 0                       | 1(33.2)                | 1(3.7)              |
| SD                                           | 1(100)             | 0                  | 0                       | 3(18.75)                 | 1(50.0)                | 1(25.0)                 | 0                      | 6(22.2)             |
| PD                                           | 0                  | 0                  | 1(100)                  | 5(31.25)                 | 0                      | 2(50.0)                 | 1(33.3)                | 9(33.3)             |
| ORR                                          | 0                  | 0                  | 0                       | 4(25.0)                  | 1(50.0)                | 1(25.0)                 | 1(33.3)                | 7(25.9)             |
| DCR                                          | 1(100)             | 0                  | 0                       | 7(43.75)                 | 2(100.0)               | 2(50.0)                 | 1(33.3)                | 13(48.1)            |
| Received HER2-targeting therapies before     | 0                  | 1                  | 1                       | 10                       | 1                      | 7                       | 0                      | 20                  |
| CR                                           | 0                  | 0                  | 0                       | 0                        | 0                      | 0                       | 0                      | 0                   |
| PR                                           | 0                  | 0                  | 0                       | 0                        | 1(100.0)               | 1(14.3)                 | 0                      | 2(10.0)             |
| Unconfirmed PR                               | 0                  | 0                  | 0                       | 0                        | 0                      | 1(14.3)                 | 0                      | 1(5.0)              |
| SD                                           | 0                  | 0                  | 0                       | 4(40.0)                  | 0                      | 2(28.6)                 | 0                      | 6(30.0)             |
| PD                                           | 0                  | 1(100)             | 1(100)                  | 5(50.0)                  | 0                      | 3(42.9)                 | 0                      | 10(50.0)            |
| ORR                                          | 0                  | 0                  | 0                       | 0                        | 1(100.0)               | 2(28.6)                 | 0                      | 3(15.0)             |
| DCR                                          | 0                  | 0                  | 0                       | 4(40.0)                  | 1(100.0)               | 4(57.1)                 | 0                      | 9(45.0)             |
