# Supplementary material for: Phase I study of the recombinant humanized anti-HER2 monoclonal antibody–MMAE conjugate RC48-ADC in patients with HER2-positive advanced solid tumors
Source: Springer Nature journal article supplement (doi:10.1007/s10120-021-01168-7), 2021-05-04
Supplement: MOESM6 [file 19131176]

**Supplementary table 1.** Analysis on the incidence of AE and DLT in DLT observation period (day1-21)

|     | 0.1mg/kg<br>N=1 | 0.5mg/kg<br>N=1 | 1.0mg/kg Q2W<br>N=3 | 2.0mg/kg Q2W<br>N=35 | 2.0mg/kg Q3W<br>N=3 | 2.5mg/kg Q2W<br>N=11 | 3.0mg/kg Q2W<br>N=3 | Total<br>N=57 |
|-----|-----------------|-----------------|---------------------|----------------------|---------------------|----------------------|---------------------|---------------|
| AE  | 1(100.0)        | 1(100.0)        | 3(100.0)            | 32(91.4)             | 3(100)              | 11(100.0)            | 3(100.0)            | 54(94.7)      |
| DLT | 0(0)            | 0(0)            | 0(0)                | 0(0)                 | 0(0)                | 2(18.2)              | 1(33.3)             | 3(12.0)       |
